# Supplementary material for: Populus euphratica Phospholipase Dδ Increases Salt Tolerance by Regulating K+/Na+ and ROS Homeostasis in Arabidopsis
Source: MDPI journal article supplement (doi:10.3390/ijms23094911), 2022-04-28
Supplement: s1 [file s1]

**Table S1.** Accession numbers of PLD $\delta$  orthologs used in multiple sequence alignment and phylogenetic analysis.

| Sequence name  | Accession number |
|----------------|------------------|
| AtPLD $\delta$ | NP_567989.1      |
| PePLD $\delta$ | XM_011023928.1   |
| NtPLD $\delta$ | XP_016456678.1   |
| PtPLD $\delta$ | XP_024457238.1   |
| StPLD $\delta$ | XP_006340788.1   |
| OsPLD $\delta$ | XP_015647988.1   |

**Table S2.** Primers used for quantitative real-time PCR

| Gene                            | Forward primer (5'–3')  | Reverse primer (5'–3')        |
|---------------------------------|-------------------------|-------------------------------|
| <i>AtSOD</i>                    | AGGAAACATCACTGTTGGAGAT  | GAGTTTGGTCCAGTAGAGGGAA        |
| <i>AtPOD</i>                    | CGTGCCCTTCATATTGTTGG    | GACGCCATCAACAACGAGTC          |
| <i>AtAPX</i>                    | AATATGCTGACGATGAGGATGC  | CAAGAATCAAGGAGGTAGGAGA<br>TG  |
| <i>AtSOS1</i>                   | GTGAAGCAATCAAGCGGAAA    | TGCGAAGAAGGCGTAGAACA          |
| <i>AtAHA2</i>                   | TGACTGATCTTCGATCCTCTCA  | GAGAATGTGCATGTGCCAAA          |
| <i>PePLD<math>\delta</math></i> | TGATGGGCCAGCTGCATATGAT  | AGGTGGAACTATTGTGGTTCCATC<br>C |
| <i>AtACTIN2</i>                 | GGTAACATTGTGCTCAGTGGTGG | AACGACCTTAATCTTCATGCTGC       |
